# Supplementary material for: A high performance xylose microbial fuel cell enabled by Ochrobactrum sp. 575 cells
Source: Royal Society of Chemistry journal article supplement (doi:10.1039/c4ra05077k), 2014-01-01
Supplement: c4ra05077k1.pdf [file c4ra05077k1.pdf]

### Supplementary Data

**Table S1** Electricity production of original and evolved bacteria (external resistance is 1.8k $\Omega$ ).

| Bacteria       | Open voltage (mV) | Power density (mW/m <sup>3</sup> ) |
|----------------|-------------------|------------------------------------|
| Origin         | 180               | 85                                 |
| Generation I   | 330               | 205                                |
| Generation II  | 383               | 283                                |
| Generation III | 680               | 1473                               |

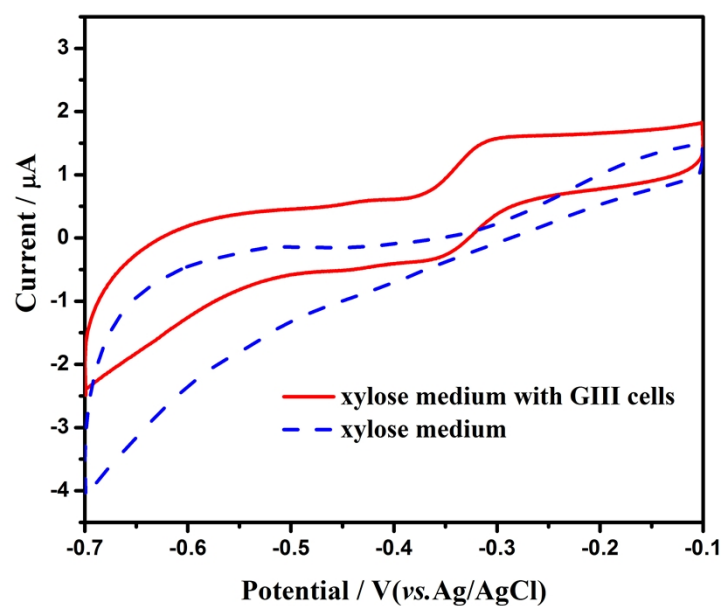

Fig. S1 CV curves of carbon fiber anode in xylose medium with and without GIII cells. (scan rate 1 mV s<sup>-1</sup>)

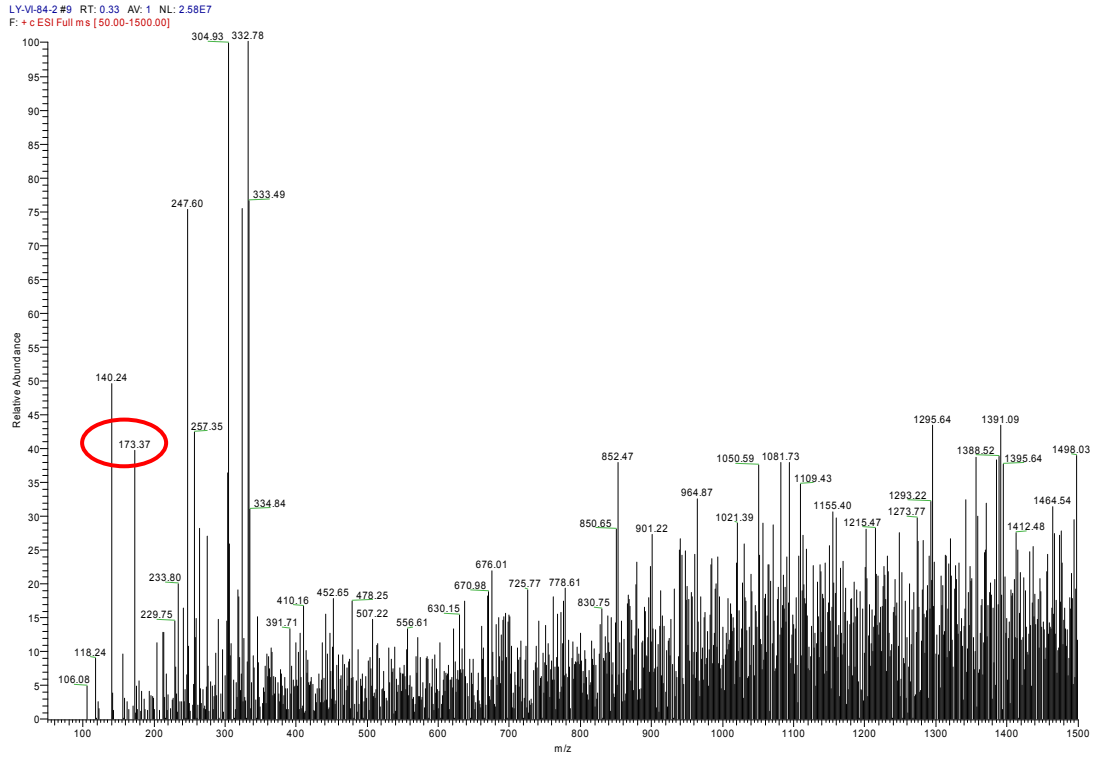

Fig.S2 HPLC-MSspectra of the supernatant

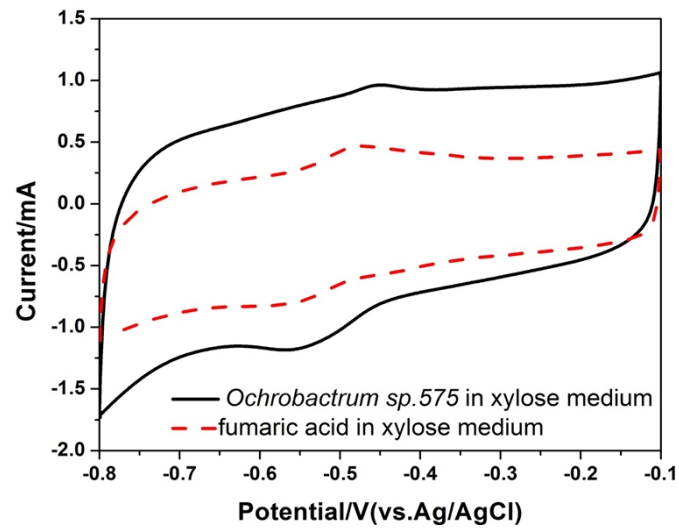

Fig.S3. Comparison of cyclic voltammograms between fumaric acid and *Ochrobactrum sp. 575* in xylose medium.

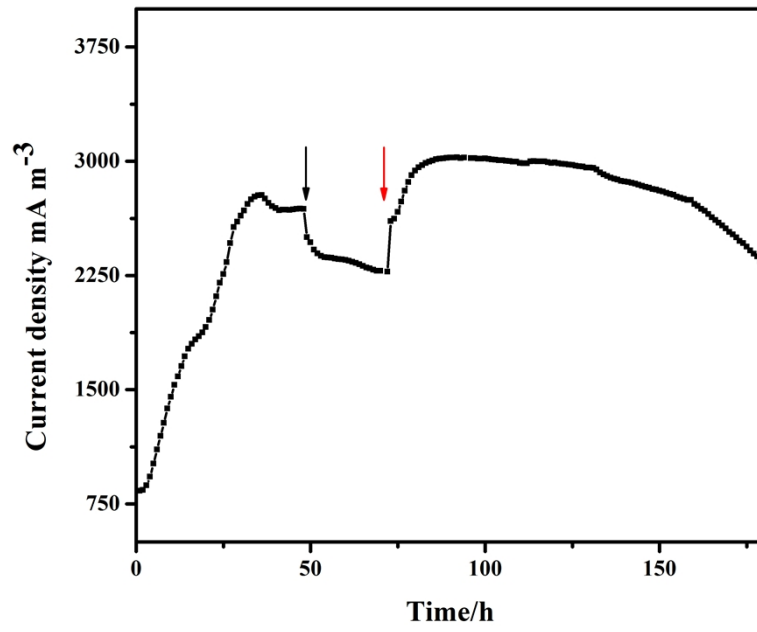

Fig.S4. Discharge profile of Generation III cells. The black arrow indicates the replace of anolyte with fresh medium. The red arrow indicates the addition of fumaric acid.
